# Supplementary material
Source: publisher figshare collection journal article supplement (https://acs.figshare.com/ndownloader/files/4465444)
Supplement: Supplementary file 1 [file 4465444]

  
data_tal41m 
  
_audit_creation_method            SHELXL-97 
_chemical_name_systematic 
; 
 ? 
; 
_chemical_name_common             ? 
_chemical_melting_point           ? 
_chemical_formula_moiety          ? 
_chemical_formula_sum 
 'C6 H10 N4 O' 
_chemical_formula_weight          154.18 
  
loop_ 
 _atom_type_symbol 
 _atom_type_description 
 _atom_type_scat_dispersion_real 
 _atom_type_scat_dispersion_imag 
 _atom_type_scat_source 
 'C'  'C'   0.0033   0.0016 
 'International Tables Vol C Tables 4.2.6.8 and 6.1.1.4' 
 'H'  'H'   0.0000   0.0000 
 'International Tables Vol C Tables 4.2.6.8 and 6.1.1.4' 
 'N'  'N'   0.0061   0.0033 
 'International Tables Vol C Tables 4.2.6.8 and 6.1.1.4' 
 'O'  'O'   0.0106   0.0060 
 'International Tables Vol C Tables 4.2.6.8 and 6.1.1.4' 
  
_symmetry_cell_setting            Orthorhombic 
_symmetry_space_group_name_H-M    P2(1)2(1)2(1) 
  
loop_ 
 _symmetry_equiv_pos_as_xyz 
 'x, y, z' 
 '-x+1/2, -y, z+1/2' 
 '-x, y+1/2, -z+1/2' 
 'x+1/2, -y+1/2, -z' 
  
_cell_length_a                    7.2868(14) 
_cell_length_b                    9.2430(17) 
_cell_length_c                    11.019(2) 
_cell_angle_alpha                 90.00 
_cell_angle_beta                  90.00 
_cell_angle_gamma                 90.00 
_cell_volume                      742.2(2) 
_cell_formula_units_Z             4 
_cell_measurement_temperature     173(2) 
_cell_measurement_reflns_used     ? 
_cell_measurement_theta_min       ? 
_cell_measurement_theta_max       ? 
  
_exptl_crystal_description        rod 
_exptl_crystal_colour             colorless 
_exptl_crystal_size_max           0.33 
_exptl_crystal_size_mid           0.16 
_exptl_crystal_size_min           0.14 
_exptl_crystal_density_meas       0 
_exptl_crystal_density_diffrn     1.380 
_exptl_crystal_density_method     'not measured' 
_exptl_crystal_F_000              328 
_exptl_absorpt_coefficient_mu     0.100 
_exptl_absorpt_correction_type    none 
_exptl_absorpt_correction_T_min   ? 
_exptl_absorpt_correction_T_max   ? 
_exptl_absorpt_process_details    ? 
  
_exptl_special_details 
; 
 ? 
; 
  
_diffrn_ambient_temperature       173(2) 
_diffrn_radiation_wavelength      0.71073 
_diffrn_radiation_type            MoK\a 
_diffrn_radiation_source          'fine-focus sealed tube' 
_diffrn_radiation_monochromator   graphite 
_diffrn_measurement_device_type   'CCD area detector' 
_diffrn_measurement_method        'phi and omega scans' 
_diffrn_detector_area_resol_mean  ? 
_diffrn_standards_number          ? 
_diffrn_standards_interval_count  ? 
_diffrn_standards_interval_time   ? 
_diffrn_standards_decay_%         ? 
_diffrn_reflns_number             8116 
_diffrn_reflns_av_R_equivalents   0.0267 
_diffrn_reflns_av_sigmaI/netI     0.0220 
_diffrn_reflns_limit_h_min        -9 
_diffrn_reflns_limit_h_max        9 
_diffrn_reflns_limit_k_min        -11 
_diffrn_reflns_limit_k_max        11 
_diffrn_reflns_limit_l_min        -14 
_diffrn_reflns_limit_l_max        14 
_diffrn_reflns_theta_min          2.88 
_diffrn_reflns_theta_max          26.99 
_reflns_number_total              1609 
_reflns_number_gt                 1561 
_reflns_threshold_expression      >2sigma(I) 
  
_computing_data_collection        'Bruker SMART' 
_computing_cell_refinement        'Bruker SMART' 
_computing_data_reduction         'Bruker SAINT' 
_computing_structure_solution     'SHELXS-97 (Sheldrick, 1990)' 
_computing_structure_refinement   'SHELXL-97 (Sheldrick, 1997)' 
_computing_molecular_graphics     'Bruker SHELXTL' 
_computing_publication_material   'Bruker SHELXTL' 
  
_refine_special_details 
; 
 Refinement of F^2^ against ALL reflections.  The weighted R-factor wR and 
 goodness of fit S are based on F^2^, conventional R-factors R are based 
 on F, with F set to zero for negative F^2^. The threshold expression of 
 F^2^ > 2sigma(F^2^) is used only for calculating R-factors(gt) etc. and is 
 not relevant to the choice of reflections for refinement.  R-factors based 
 on F^2^ are statistically about twice as large as those based on F, and R- 
 factors based on ALL data will be even larger. 
; 
  
_refine_ls_structure_factor_coef  Fsqd 
_refine_ls_matrix_type            full 
_refine_ls_weighting_scheme       calc 
_refine_ls_weighting_details 
 'calc w=1/[\s^2^(Fo^2^)+(0.0661P)^2^+0.1715P] where P=(Fo^2^+2Fc^2^)/3' 
_atom_sites_solution_primary      direct 
_atom_sites_solution_secondary    difmap 
_atom_sites_solution_hydrogens    geom 
_refine_ls_hydrogen_treatment     mixed 
_refine_ls_extinction_method      none 
_refine_ls_extinction_coef        ? 
_refine_ls_abs_structure_details 
 'Flack H D (1983), Acta Cryst. A39, 876-881' 
_refine_ls_abs_structure_Flack    0(2) 
_refine_ls_number_reflns          1609 
_refine_ls_number_parameters      101 
_refine_ls_number_restraints      0 
_refine_ls_R_factor_all           0.0455 
_refine_ls_R_factor_gt            0.0443 
_refine_ls_wR_factor_ref          0.1149 
_refine_ls_wR_factor_gt           0.1141 
_refine_ls_goodness_of_fit_ref    1.106 
_refine_ls_restrained_S_all       1.106 
_refine_ls_shift/su_max           0.000 
_refine_ls_shift/su_mean          0.000 
  
loop_ 
 _atom_site_label 
 _atom_site_type_symbol 
 _atom_site_fract_x 
 _atom_site_fract_y 
 _atom_site_fract_z 
 _atom_site_U_iso_or_equiv 
 _atom_site_adp_type 
 _atom_site_occupancy 
 _atom_site_symmetry_multiplicity 
 _atom_site_calc_flag 
 _atom_site_refinement_flags 
 _atom_site_disorder_assembly 
 _atom_site_disorder_group 
C1 C 0.4732(2) 0.67554(16) 0.43927(14) 0.0214(3) Uani 1 1 d . . . 
C2 C 0.4884(3) 0.57395(19) 0.33506(15) 0.0304(4) Uani 1 1 d . . . 
H2A H 0.6162 0.5384 0.3297 0.037 Uiso 1 1 calc R . . 
H2B H 0.4607 0.6269 0.2591 0.037 Uiso 1 1 calc R . . 
C3 C 0.3595(2) 0.44511(19) 0.34563(16) 0.0300(4) Uani 1 1 d . . . 
H3A H 0.3541 0.3955 0.2661 0.036 Uiso 1 1 calc R . . 
H3B H 0.2347 0.4812 0.3641 0.036 Uiso 1 1 calc R . . 
C4 C 0.4139(3) 0.33498(19) 0.44233(17) 0.0343(4) Uani 1 1 d . . . 
H4A H 0.3391 0.2467 0.4306 0.041 Uiso 1 1 calc R . . 
H4B H 0.5439 0.3080 0.4294 0.041 Uiso 1 1 calc R . . 
C5 C 0.3913(3) 0.3854(2) 0.57321(17) 0.0341(4) Uani 1 1 d . . . 
H5A H 0.4057 0.3008 0.6274 0.041 Uiso 1 1 calc R . . 
H5B H 0.2648 0.4225 0.5838 0.041 Uiso 1 1 calc R . . 
C6 C 0.5259(3) 0.50270(18) 0.61333(15) 0.0277(4) Uani 1 1 d . . . 
H6A H 0.5199 0.5128 0.7027 0.033 Uiso 1 1 calc R . . 
H6B H 0.6521 0.4724 0.5918 0.033 Uiso 1 1 calc R . . 
N1 N 0.4873(2) 0.64413(16) 0.55697(13) 0.0289(4) Uani 1 1 d . . . 
N2 N 0.4650(2) 0.76521(16) 0.62326(14) 0.0283(4) Uani 1 1 d . . . 
N3 N 0.43823(19) 0.86594(16) 0.53951(14) 0.0269(3) Uani 1 1 d . . . 
N4 N 0.4414(2) 0.81711(16) 0.42471(13) 0.0299(4) Uani 1 1 d . . . 
O1 O 0.40967(19) 0.99783(13) 0.56538(15) 0.0390(4) Uani 1 1 d . . . 
  
loop_ 
 _atom_site_aniso_label 
 _atom_site_aniso_U_11 
 _atom_site_aniso_U_22 
 _atom_site_aniso_U_33 
 _atom_site_aniso_U_23 
 _atom_site_aniso_U_13 
 _atom_site_aniso_U_12 
C1 0.0216(7) 0.0241(7) 0.0184(7) 0.0017(6) 0.0002(6) 0.0004(6) 
C2 0.0375(10) 0.0356(9) 0.0182(7) -0.0007(7) 0.0025(7) 0.0033(8) 
C3 0.0284(8) 0.0371(10) 0.0244(8) -0.0098(8) -0.0007(7) 0.0033(8) 
C4 0.0422(10) 0.0275(9) 0.0332(9) -0.0050(8) 0.0038(9) -0.0033(7) 
C5 0.0446(11) 0.0274(9) 0.0303(9) 0.0034(7) 0.0079(8) -0.0057(8) 
C6 0.0338(9) 0.0285(9) 0.0208(7) 0.0035(6) 0.0008(7) 0.0019(7) 
N1 0.0291(8) 0.0315(7) 0.0260(8) -0.0001(6) 0.0000(6) -0.0009(6) 
N2 0.0298(8) 0.0284(7) 0.0267(7) -0.0048(5) -0.0014(6) 0.0001(6) 
N3 0.0228(7) 0.0245(7) 0.0335(8) -0.0019(6) -0.0012(6) -0.0024(6) 
N4 0.0300(7) 0.0298(7) 0.0299(8) 0.0035(6) -0.0013(6) 0.0005(6) 
O1 0.0353(7) 0.0245(7) 0.0573(9) -0.0070(6) -0.0073(7) 0.0004(5) 
  
_geom_special_details 
; 
 All esds (except the esd in the dihedral angle between two l.s. planes) 
 are estimated using the full covariance matrix.  The cell esds are taken 
 into account individually in the estimation of esds in distances, angles 
 and torsion angles; correlations between esds in cell parameters are only 
 used when they are defined by crystal symmetry.  An approximate (isotropic) 
 treatment of cell esds is used for estimating esds involving l.s. planes. 
; 
  
loop_ 
 _geom_bond_atom_site_label_1 
 _geom_bond_atom_site_label_2 
 _geom_bond_distance 
 _geom_bond_site_symmetry_2 
 _geom_bond_publ_flag 
C1 N1 1.333(2) . ? 
C1 N4 1.339(2) . ? 
C1 C2 1.487(2) . ? 
C2 C3 1.521(3) . ? 
C2 H2A 0.9900 . ? 
C2 H2B 0.9900 . ? 
C3 C4 1.526(3) . ? 
C3 H3A 0.9900 . ? 
C3 H3B 0.9900 . ? 
C4 C5 1.525(3) . ? 
C4 H4A 0.9900 . ? 
C4 H4B 0.9900 . ? 
C5 C6 1.527(3) . ? 
C5 H5A 0.9900 . ? 
C5 H5B 0.9900 . ? 
C6 N1 1.474(2) . ? 
C6 H6A 0.9900 . ? 
C6 H6B 0.9900 . ? 
N1 N2 1.346(2) . ? 
N2 N3 1.325(2) . ? 
N3 O1 1.269(2) . ? 
N3 N4 1.343(2) . ? 
  
loop_ 
 _geom_angle_atom_site_label_1 
 _geom_angle_atom_site_label_2 
 _geom_angle_atom_site_label_3 
 _geom_angle 
 _geom_angle_site_symmetry_1 
 _geom_angle_site_symmetry_3 
 _geom_angle_publ_flag 
N1 C1 N4 110.05(14) . . ? 
N1 C1 C2 127.44(15) . . ? 
N4 C1 C2 122.51(14) . . ? 
C1 C2 C3 112.92(14) . . ? 
C1 C2 H2A 109.0 . . ? 
C3 C2 H2A 109.0 . . ? 
C1 C2 H2B 109.0 . . ? 
C3 C2 H2B 109.0 . . ? 
H2A C2 H2B 107.8 . . ? 
C2 C3 C4 114.55(15) . . ? 
C2 C3 H3A 108.6 . . ? 
C4 C3 H3A 108.6 . . ? 
C2 C3 H3B 108.6 . . ? 
C4 C3 H3B 108.6 . . ? 
H3A C3 H3B 107.6 . . ? 
C5 C4 C3 115.37(15) . . ? 
C5 C4 H4A 108.4 . . ? 
C3 C4 H4A 108.4 . . ? 
C5 C4 H4B 108.4 . . ? 
C3 C4 H4B 108.4 . . ? 
H4A C4 H4B 107.5 . . ? 
C4 C5 C6 114.93(15) . . ? 
C4 C5 H5A 108.5 . . ? 
C6 C5 H5A 108.5 . . ? 
C4 C5 H5B 108.5 . . ? 
C6 C5 H5B 108.5 . . ? 
H5A C5 H5B 107.5 . . ? 
N1 C6 C5 112.63(15) . . ? 
N1 C6 H6A 109.1 . . ? 
C5 C6 H6A 109.1 . . ? 
N1 C6 H6B 109.1 . . ? 
C5 C6 H6B 109.1 . . ? 
H6A C6 H6B 107.8 . . ? 
C1 N1 N2 109.73(14) . . ? 
C1 N1 C6 128.14(15) . . ? 
N2 N1 C6 122.11(14) . . ? 
N3 N2 N1 102.94(14) . . ? 
O1 N3 N2 122.86(16) . . ? 
O1 N3 N4 122.48(16) . . ? 
N2 N3 N4 114.66(15) . . ? 
C1 N4 N3 102.62(13) . . ? 
  
_diffrn_measured_fraction_theta_max    0.997 
_diffrn_reflns_theta_full              26.99 
_diffrn_measured_fraction_theta_full   0.997 
_refine_diff_density_max    0.265 
_refine_diff_density_min   -0.273 
_refine_diff_density_rms    0.070 
